# Supplementary material for: Structure of Aedes aegypti procarboxypeptidase B1 and its binding with Dengue virus for controlling infection
Source: Life Sci Alliance. 2021 Nov 8;5(1):e202101211. doi: 10.26508/lsa.202101211 (PMC8605224; doi:10.26508/lsa.202101211)
Supplement: Supplementary file 5 [file LSA-2021-01211_TableS3.docx]

Supplementary table S3. Site-directed mutagenesis of PCPBAe1 and oligonucleotides

| Peptide | Mutation | Oligonucleotide (5’-3’) |
| --- | --- | --- |
| Asp251Glu |  | GCGGCGGGTGGTAGCGAAGATTGGGCGTTCGCG  CGCGAACGCCCAATCTTCGCTACCACCCGCCGC |
| Ser239Gly |  | TACACCGTGGGTAGCGGTACCAACGTTCTGTAT  ATACAGAACGTTGGTACCGCTACCCACGGTGTA |
| Tyr4A-Glu21A | Asp18AGlu19A del | GTTCCGGAAAGCCCGGCGGAAATCCTGTAT  ATACAGGATTTCCGCCGGGCTTTCCGGAAC |
| Ala81A-Glu20 | Asp5Ala, Arg6Ala,  Asp7Ala | GGCATGAGCATGCTGGCGGCGGCGGTGAGCACCAGCTAC  GTAGCTGGTGCTCACCGCCGCCGCCAGCATGCTCATGCC |
| Gly162-Arg172 | Glu168Ala, Glu170Ala, Arg172Ala | GAAACCGCGTTTAGCGCGCCGGCGACCGCGGCGGTGCGTGATGCG  CGCATCACGCACCGCCGCGGTCGCCGGCGCGCTAAACGCGGTTTC |
| Val300-Phe305 del | Val300-Phe305 del | GCGATGGCGCTGAAATAAGTTGCGCAAATGTTT  AAACATTTGCGCAACTTATTTCAGCGCCATCGC |
| ProCP | ProCP | AGCATGCTGGACTAGCGTGATGTGAGC  GCTCACATCACGCTAGTCCAGCATGCT |
